# Supplementary material for: Multi-Drug Resistant Plasmids with ESBL/AmpC and mcr-5.1 in Paraguayan Poultry Farms: The Linkage of Antibiotic Resistance and Hatcheries
Source: MDPI journal article supplement (doi:10.3390/microorganisms9040866), 2021-04-17
Supplement: s1 [file s1]

## Supplementary data

Tree scale: 0.1

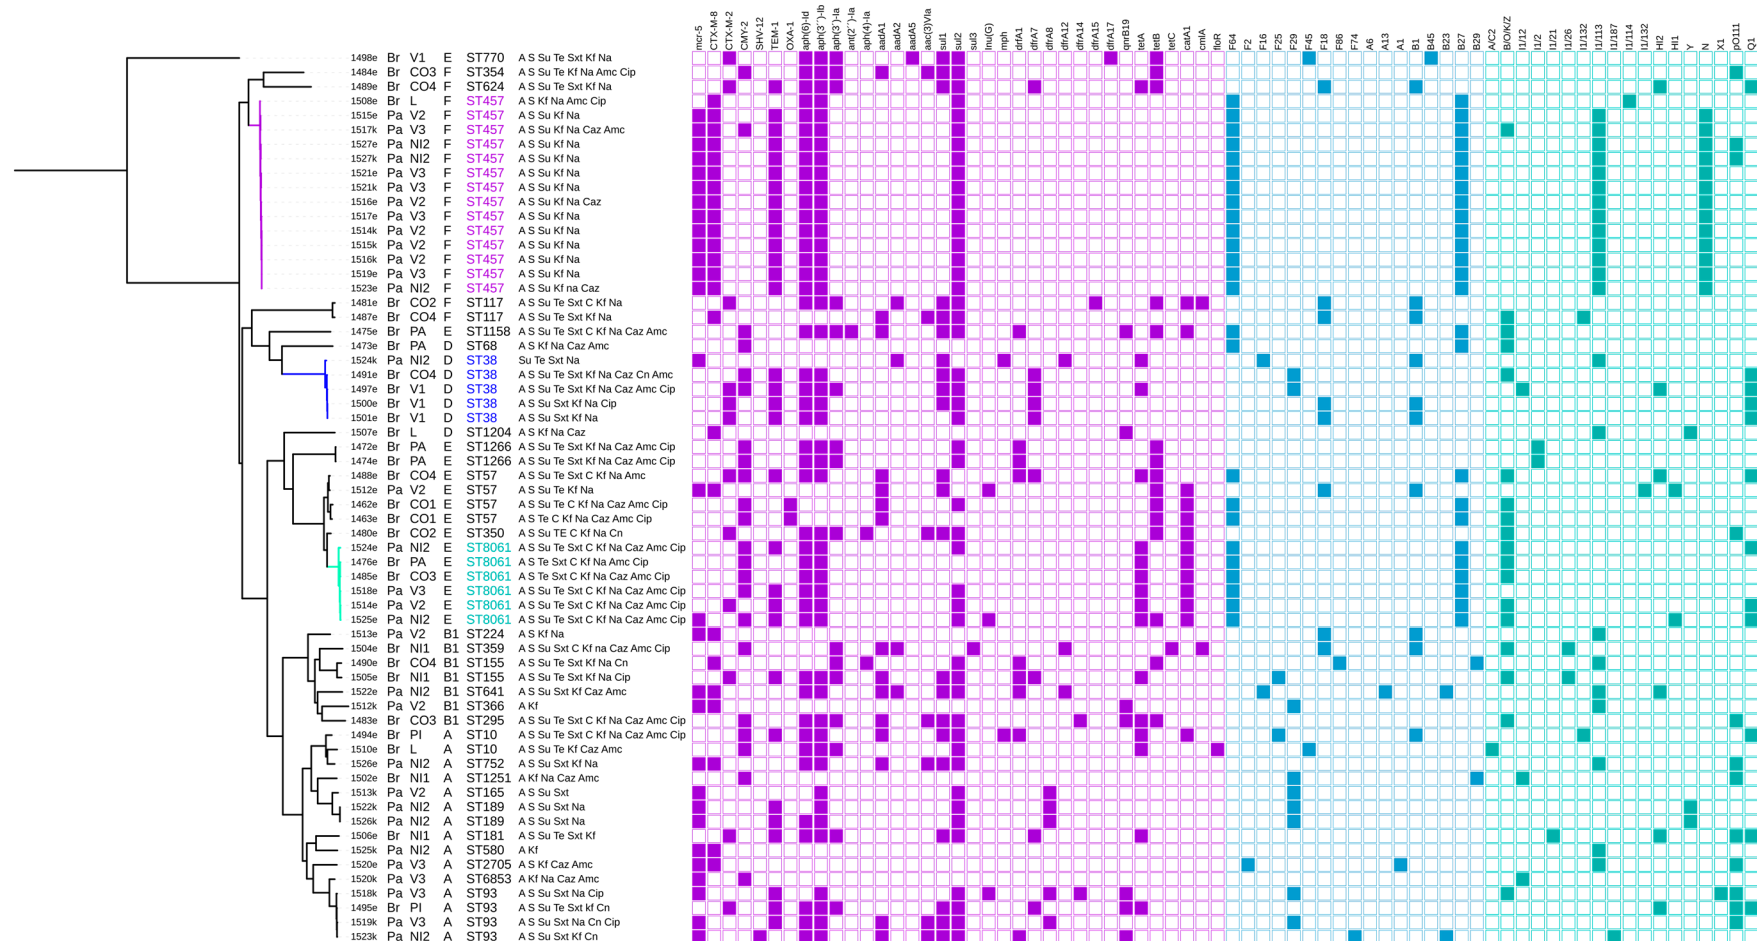

**Figure S1.** Phylogeny of *Escherichia coli* isolates recovered in this study and all detected antibiotic resistance genes and plasmid replicons. The columns show name of the isolate; hatchery (Br – Brazil, Pa – Paraguay); farm (Villeta – V1-3; Nueva Italia NI1-2; Colonel Oviedo CO1-4; Paraguari – PA, Piribebuy – PI, Luque – L); phylogenetic group; sequence type; antibiotic resistance phenotype (resistance to: A – ampicillin, S – streptomycin, Su – sulphonamides, Te – tetracycline, Sxt – trimethoprim-sulfamethoxazole, C – chloramphenicol Kf, – cefalotin, Na – nalidixic acid, Caz – ceftazidime, Cn – gentamicin, Amc – amoxicillin-clavulanic acid, Cip – ciprofloxacin); purple squares indicates presence of antibiotic resistance genes; blue (F replicons) and turquoise squares indicates presence of plasmid replicons.

Tree scale: 0.1

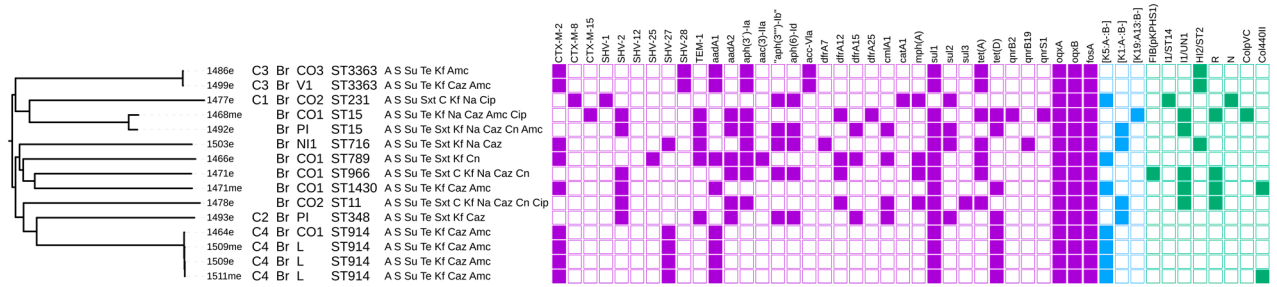

| Isolate | Cluster | Breed | Farm | Phenotypic resistance   | ESBL genes                                                   | Conjugation |
|---------|---------|-------|------|-------------------------|--------------------------------------------------------------|-------------|
| 1479e   | C1      | Br    | CO2  | A Su Te Sxt C Kf Na Cip | <i>bla</i> <sub>CTX-M-8</sub>                                | NP          |
| 1496e   | C2      | Br    | PI   | A S Su Te Sxt Kf Caz    | <i>bla</i> <sub>SHV-2</sub>                                  | NP          |
| 1482e   | C3      | Br    | CO3  | A S Su Te Kf            | <i>bla</i> <sub>CTX-M-2</sub>                                | Yes         |
| 1465e   | C4      | Br    | CO1  | A S Su Te Kf Caz Amc    | <i>bla</i> <sub>CTX-M-2</sub> , <i>bla</i> <sub>SHV-27</sub> | Yes         |
| 1469e   | C4      | Br    | CO1  | A S Su Te Kf Caz Amc    | <i>bla</i> <sub>CTX-M-2</sub> , <i>bla</i> <sub>SHV-27</sub> | Yes         |
| 1470e   | C4      | Br    | CO1  | A S Su Te Kf Caz Amc    | <i>bla</i> <sub>CTX-M-2</sub> , <i>bla</i> <sub>SHV-27</sub> | Yes         |
| 1511e   | C4      | Br    | L    | A S Su Te Kf Caz Amc    | <i>bla</i> <sub>CTX-M-2</sub> , <i>bla</i> <sub>SHV-27</sub> | Yes         |

**Figure S2.** Phylogeny of selected *Klebsiella pneumoniae* isolates and table with data of non-sequenced *K. pneumoniae* isolates. The columns in phylogeny part show name of the isolate; cluster distinguished using pulsed-field gel electrophoresis (PFGE) the isolate belonged to (C1-C4; defined at 100% similarity level); hatchery (Br – Brazil); farm (Villeta – V1; Nueva Italia NI1; Colonel Oviedo CO1-3; Piribebuy – PI; Luque – L); sequence type, antibiotic resistance phenotype (resistance to: A – ampicillin, S – streptomycin, Su – sulphonamides, Te – tetracycline, Sxt – trimethoprim-sulfamethoxazole, C – chloramphenicol Kf, – cefalotin, Na – nalidixic acid, Caz – ceftazidime, Cn – gentamicin, Amc – amoxicillin-clavulanic acid, Cip – ciprofloxacin); purple squares indicates presence of antibiotic resistance genes; blue (F replicons) and turquoise squares indicates presence of plasmid replicons. The table part shows available data of non-sequenced *K. pneumoniae* isolates; the last column Conjugation indicates whether the conjugative transfer of extended-spectrum beta-lactam (ESBL) encoding genes was successful (Yes) or not performed (NP).

Tree scale: 0.0001

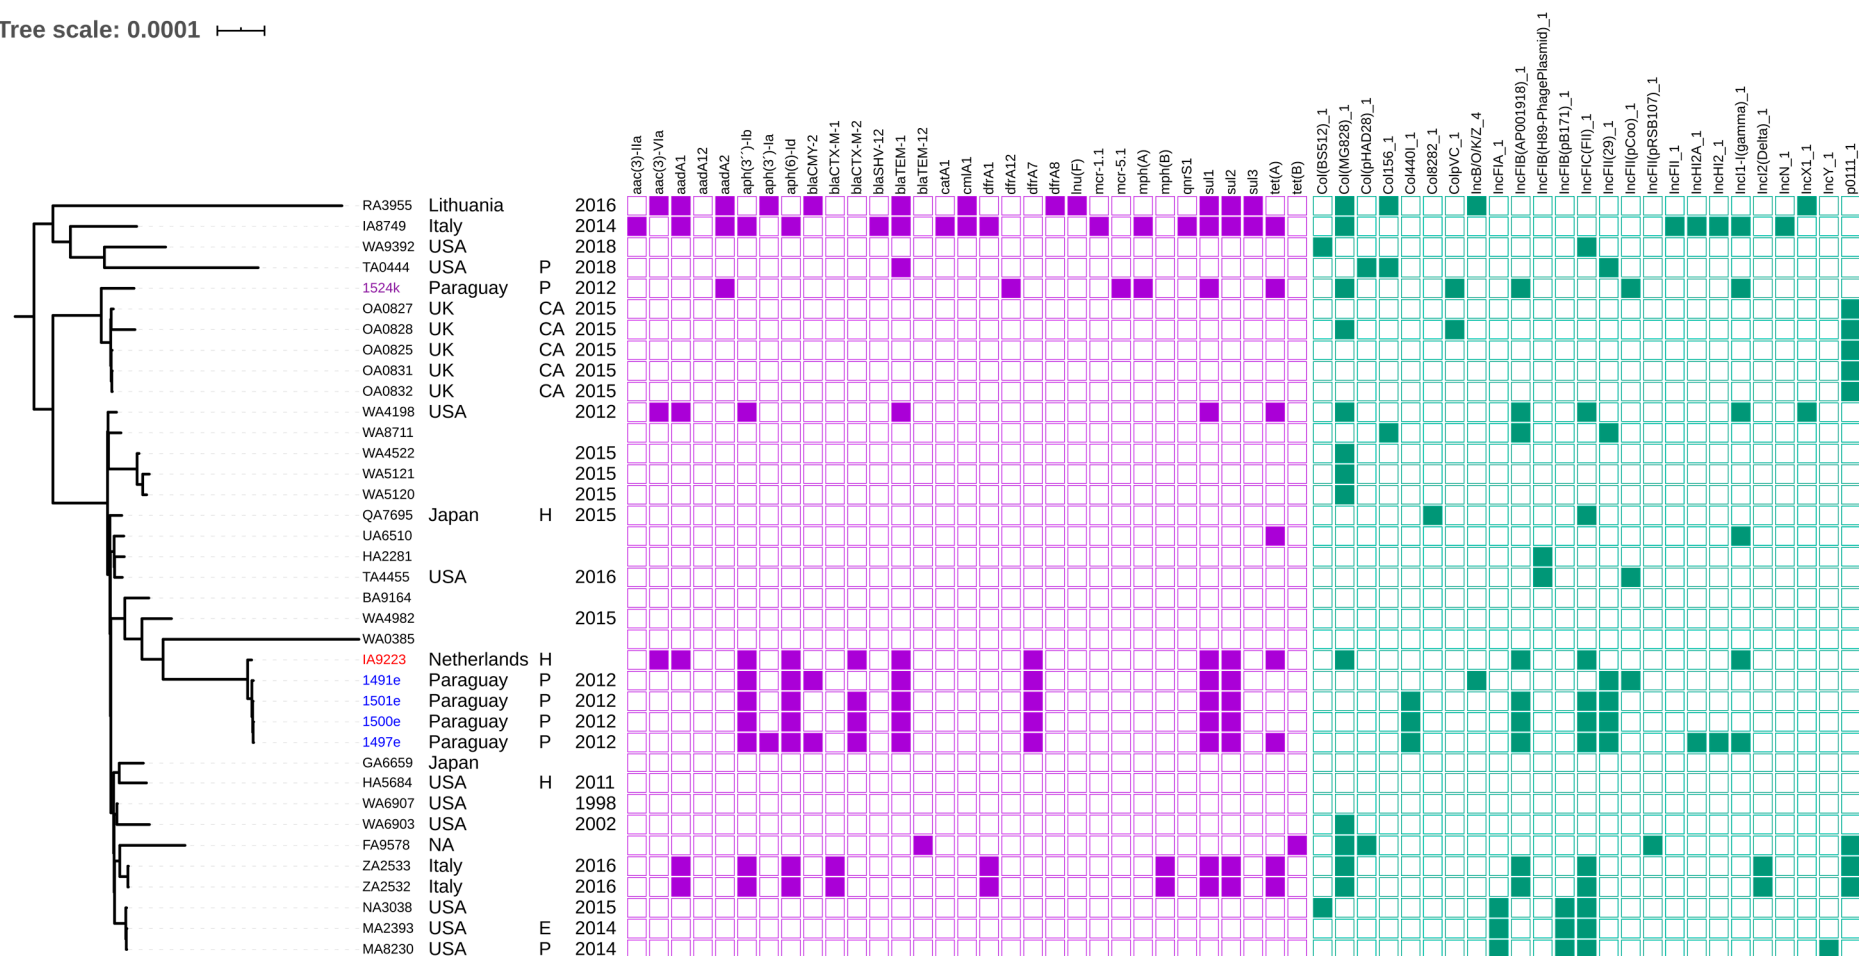

**Figure S3.** Phylogeny of *E. coli* sequence type (ST) 38 – comparison of our isolates with closely related ones recovered from EnteroBase. The sample names refer to original name of assemblies downloaded from EnteroBase. Our isolates from the Brazilian hatchery are highlighted in blue, an isolate from the Paraguayan hatchery is purple and a human strain SCP05-44 (ECS\_EA9861AA, referred as IA9223 here) which is closely related (24 – 25 SNPs) to the Paraguayan strains is highlighted in red. The other columns reveal country of origin, source of origin (P – poultry; CA – companion animal, H – human, E – environment) and year of isolation. The purple squares represent presence of respective antibiotic resistance genes and the turquoise squares show presence of plasmid replicons.





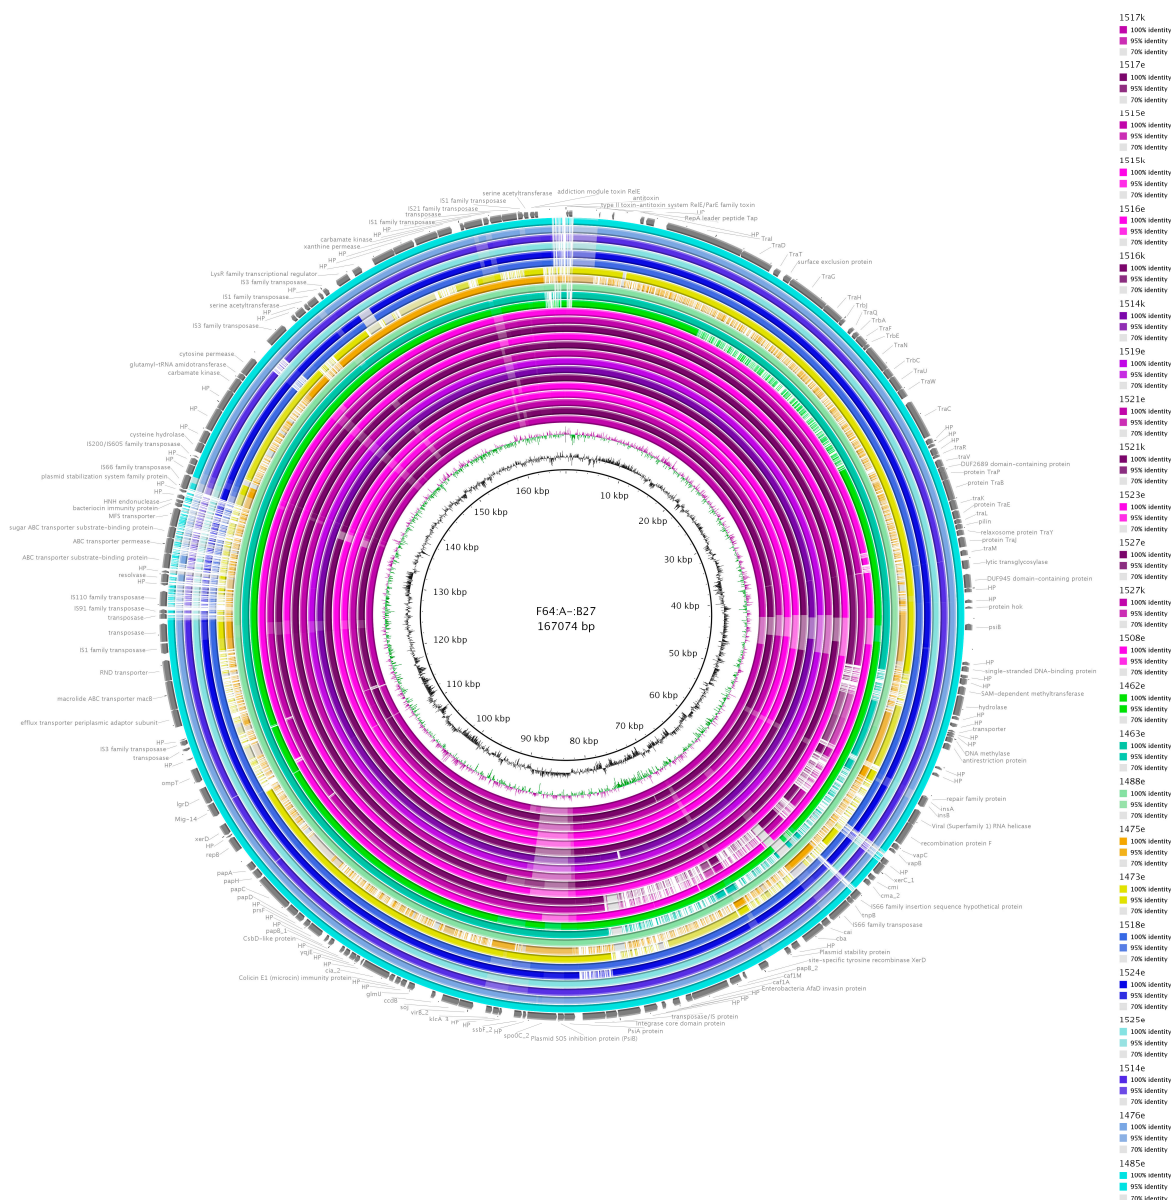

**Figure S5.** BRIG comparison of F64:A-B27 plasmids. The reference plasmid F64:A-B27 (GenBank MW800638) was obtained using Unicycler from PacBio and Illumina data of 1517k strain. Purple circles represents F64:A-B27 plasmids found in *E. coli* ST457 isolates, green circles are from *E. coli* ST57, yellow from ST1158 and ST68 and blue from ST8061.



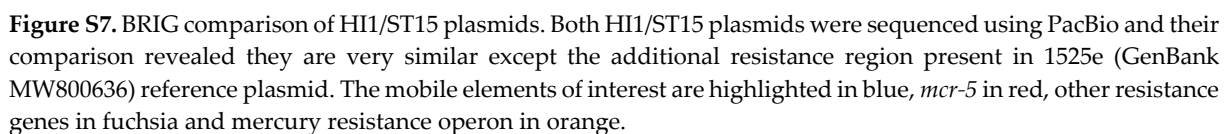

**Table S1:** Comparison of 1517k (PacBio) and 1508e genomes in progressiveMauve.

| Region   | Position (1517k) | RAST Annotation                                                                             |
|----------|------------------|---------------------------------------------------------------------------------------------|
| <b>A</b> | 618531..619256   | HTH-type transcriptional regulator gadW                                                     |
|          | 619552..620058   | hypothetical protein                                                                        |
| <b>B</b> | 1334573..1335058 | Antirestriction protein klcA                                                                |
|          | 1335150..1335968 | UPF0380 proteins YafZ and homologs                                                          |
|          | 1336058..1336291 | UPF0401 protein YkfF                                                                        |
| <b>C</b> | 1476145..1477404 | N-acetylmuramoyl-L-alanine amidase (EC 3.5.1.28)                                            |
| <b>D</b> | 1834954..1835520 | Fructose-1-phosphate phosphatase YqaB                                                       |
|          | 1835517..1835945 | Inner membrane protein YqaA                                                                 |
|          | 1836018..1837574 | Glutamate--cysteine ligase                                                                  |
|          | 1837724..1838239 | S-ribosylhomocysteine lyase                                                                 |
|          |                  | Autoinducer-2 production protein LuxS                                                       |
|          | 1838303..1839841 | Multidrug efflux system EmrAB-OMF, inner-membrane proton/drug antiporter EmrB (MFS type)    |
|          | 1839858..1841030 | Multidrug efflux system EmrAB-OMF, membrane fusion component EmrA                           |
|          | 1841007..1841129 | FIG00638175: hypothetical protein                                                           |
|          | 1841157..1841687 | Multidrug resistance regulator EmrR (MprA)                                                  |
|          | 1841778..1842113 | Uncharacterized protein YgaH                                                                |
|          | 1842103..1842840 | Inner membrane protein YgaZ                                                                 |
|          | 1842964..1844148 | Uncharacterized MFS-type transporter STM2812                                                |
|          | 1844141..1844287 | hypothetical protein                                                                        |
|          | 1844340..1845332 | Glycine betaine/L-proline transport substrate-binding protein ProX                          |
|          | 1845390..1846454 | Glycine betaine/L-proline transport systém permease protein ProW                            |
|          | 1846447..1847649 | Glycine betaine/L-proline transport ATP-binding protein ProV                                |
|          | 1848005..1848964 | Ribonucleotide reductase of class Ib (aerobic), beta subunit (EC 1.17.4.1)"                 |
|          | 1848974..1851118 | Ribonucleotide reductase of class Ib (aerobic), alpha subunit (EC 1.17.4.1)                 |
|          | 1851091..1851501 | Ribonucleotide reduction protein NrdI                                                       |
|          | 1851498..1851743 | Glutaredoxin-like protein NrdH, required for reduction of Ribonucleotide reductase class Ib |
|          | 1851952..1852383 | hypothetical protein                                                                        |
|          | 1852471..1853805 | Transcriptional regulator, GntR family domain / Aspartate aminotransferase                  |
|          | 1853862..1854191 | ElaB protein                                                                                |
|          | 1854343..1854687 | Uncharacterized protein YgaC                                                                |
|          | 1854724..1855173 | L-alanine exporter AlaE                                                                     |
|          | 1855299..1855427 | FIG00640544: hypothetical protein                                                           |
|          | 1855840..1856244 | DNA-binding protein StpA                                                                    |
|          | 1856291..1856815 | Rhodanese-domain-containing inner membrane protein YgaP                                     |

|          |                  |                                                                                   |
|----------|------------------|-----------------------------------------------------------------------------------|
|          | 1856825..1857124 | Transcriptional regulator YgaV, ArsR family                                       |
|          | 1857307..1857465 | UPF0057 membrane protein YqaE                                                     |
|          | 1857549..1857998 | Uncharacterized LysM domain protein YgaU                                          |
|          | 1857999..1858661 | CsiR, transcriptional repressor of CsiD                                           |
|          | 1858682..1860082 | gamma-aminobutyrate (GABA) permease                                               |
|          | 1860319..1861599 | Gamma-aminobutyrate:alpha-ketoglutarate<br>aminotransferase                       |
|          | 1861613..1863061 | Succinate-semialdehyde dehydrogenase [NAD(P)+]                                    |
|          | 1863084..1864352 | L-2-hydroxyglutarate oxidase                                                      |
|          | 1864372..1865349 | Carbon starvation induced protein CsiD                                            |
|          | 1865686..1867938 | Alpha-amylase (EC 3.2.1.1) (1,4-alpha-D-glucan<br>glucanohydrolase) (GLYCOGENASE) |
| <b>E</b> | 1895379..1896707 | Transposase InsG for insertion sequence element<br>IS4                            |
| <b>F</b> | 2016425..2017366 | RecT protein                                                                      |
|          | 2017363..2018184 | RecT protein                                                                      |
| <b>G</b> | 2036167..2038680 | Phage capsid and scaffold                                                         |
|          | 2038677..2040479 | Phage protein                                                                     |
|          | 2040485..2042959 | Phage protein                                                                     |
|          | 2043155..2043451 | hypothetical protein                                                              |
| <b>H</b> | 3708747..3709493 | Colanic acid biosynthesis glycosyl transferase WcaE                               |
